# Supplementary material for: Deep Learning Algorithm for Simultaneous Noise Reduction and Edge Sharpening in Low-Dose CT Images: A Pilot Study Using Lumbar Spine CT
Source: PubMed Central journal article supplement — Korean J Radiol. 2021 Aug 19;22(11):1850–7. doi: 10.3348/kjr.2021.0140 (PMC8546130; doi:10.3348/kjr.2021.0140), 2021-08-19
Supplement: kjr-22-1850-s001.pdf [file kjr-22-1850-s001.pdf]

## SUPPLEMENT

**Supplementary Table 1. Subjective Image Quality Score of Each Reader**

| Imaging Parameters                         | 50 mAs    | Denoised 50 mAs | 100 mAs   | P (ANOVA) |
|--------------------------------------------|-----------|-----------------|-----------|-----------|
| <b>Overall image quality</b>               |           |                 |           |           |
| Reader 1                                   | 2.0 ± 0.4 | 3.9 ± 0.2       | 3.0 ± 0.3 | < 0.001*  |
| Reader 2                                   | 1.9 ± 0.5 | 3.5 ± 0.5       | 2.6 ± 0.5 | < 0.001*  |
| <b>Visibility of anatomical structures</b> |           |                 |           |           |
| <b>Vertebral body</b>                      |           |                 |           |           |
| Reader 1                                   | 2.5 ± 0.7 | 3.9 ± 0.3       | 3.3 ± 0.5 | < 0.001*  |
| Reader 2                                   | 2.5 ± 0.6 | 3.7 ± 0.5       | 3.1 ± 0.7 | < 0.001*  |
| <b>Transverse and spinous processes</b>    |           |                 |           |           |
| Reader 1                                   | 2.4 ± 0.7 | 3.7 ± 0.5       | 3.2 ± 0.5 | < 0.001*  |
| Reader 2                                   | 2.6 ± 0.7 | 3.7 ± 0.5       | 3.3 ± 0.6 | < 0.001*  |
| <b>Facet joint</b>                         |           |                 |           |           |
| Reader 1                                   | 2.6 ± 0.6 | 3.7 ± 0.5       | 3.4 ± 0.6 | < 0.001*  |
| Reader 2                                   | 2.9 ± 0.8 | 3.7 ± 0.5       | 3.6 ± 0.6 | < 0.001*  |
| <b>Dural sac</b>                           |           |                 |           |           |
| Reader 1                                   | 1.1 ± 0.3 | 2.4 ± 0.6       | 1.6 ± 0.6 | < 0.001*  |
| Reader 2                                   | 1.5 ± 0.6 | 2.6 ± 0.8       | 2.3 ± 0.7 | < 0.001*  |
| <b>Ligamentum flavum</b>                   |           |                 |           |           |
| Reader 1                                   | 1.3 ± 0.4 | 2.9 ± 0.7       | 2.0 ± 0.5 | < 0.001*  |
| Reader 2                                   | 1.6 ± 0.6 | 2.8 ± 0.8       | 2.4 ± 0.8 | < 0.001*  |
| <b>Psoas muscle</b>                        |           |                 |           |           |
| Reader 1                                   | 1.7 ± 0.5 | 3.8 ± 0.5       | 2.6 ± 0.6 | < 0.001*  |
| Reader 2                                   | 1.7 ± 0.5 | 3.4 ± 0.6       | 2.6 ± 0.7 | < 0.001*  |
| <b>Paraspinal muscle</b>                   |           |                 |           |           |
| Reader 1                                   | 1.7 ± 0.6 | 3.6 ± 0.5       | 2.6 ± 0.6 | < 0.001*  |
| Reader 2                                   | 1.7 ± 0.5 | 3.1 ± 0.7       | 2.6 ± 0.7 | < 0.001*  |

Data are presented as mean ± standard deviation. \*In all cases, post-hoc tests reveal that mean score of denoised 50 mAs images was significantly higher than those of 50 mAs and 100 mAs images. ANOVA = analysis of variance
